# Supplementary material for: An APE1 inhibitor reveals critical roles of the redox function of APE1 in KSHV replication and pathogenic phenotypes
Source: PubMed Central journal article supplement (PMC5381946; doi:10.1371/journal.ppat.1006289), 2017-04-05
Supplement: ppat.1006289.s004.pdf [file ppat.1006289.s004.pdf]

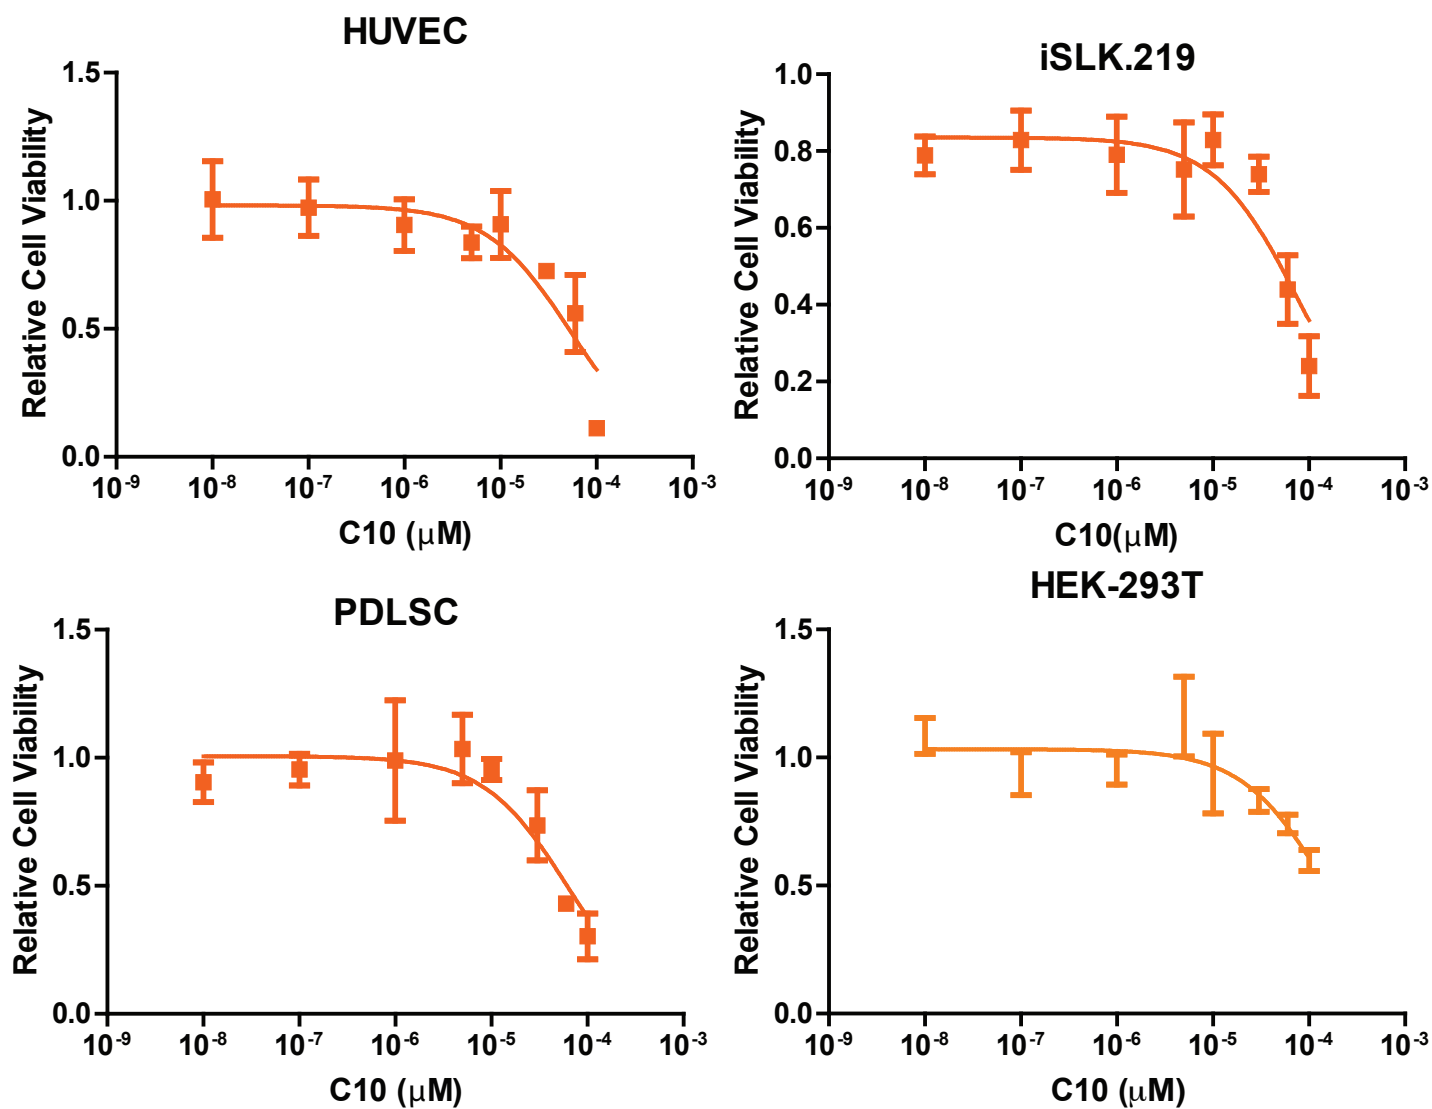

### Summary of Cytotoxicity of C10 in Different Types of Cell

| Cell | HUVEC            | PDLSC            | iSL.219          | HEK-293T          |
|------|------------------|------------------|------------------|-------------------|
| C10  | 53 $\mu\text{M}$ | 60 $\mu\text{M}$ | 75 $\mu\text{M}$ | 143 $\mu\text{M}$ |

Fig. S4. Cytotoxicities of C10 to HUVEC, PDLSC, iSLK.219 and HEK293T cells were assessed after treatment with C10 of different concentrations as indicated for 48 hours using MTT assay.
