# Supplementary material for: An APE1 inhibitor reveals critical roles of the redox function of APE1 in KSHV replication and pathogenic phenotypes
Source: PubMed Central journal article supplement (PMC5381946; doi:10.1371/journal.ppat.1006289), 2017-04-05
Supplement: ppat.1006289.s005.pdf [file ppat.1006289.s005.pdf]

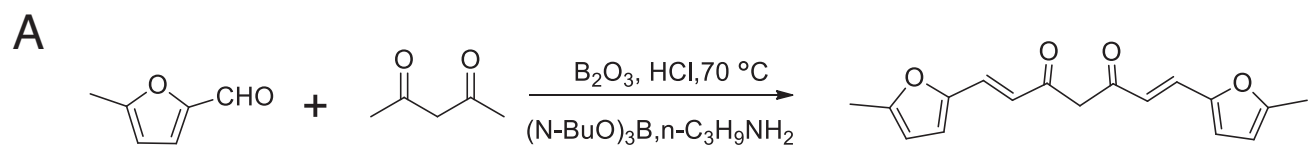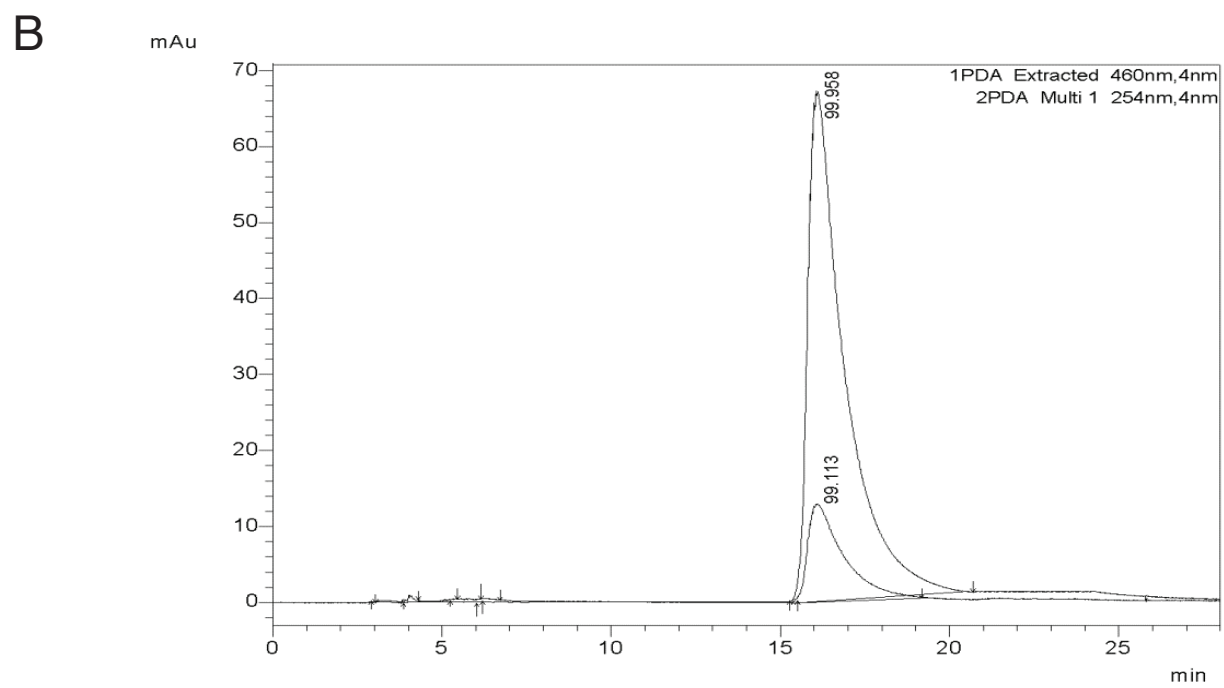

Fig. S5. Synthesis of C10 and HPLC spectrum of the compound.
