# Supplementary material for: An APE1 inhibitor reveals critical roles of the redox function of APE1 in KSHV replication and pathogenic phenotypes
Source: PubMed Central journal article supplement (PMC5381946; doi:10.1371/journal.ppat.1006289), 2017-04-05
Supplement: ppat.1006289.s006.pdf [file ppat.1006289.s006.pdf]

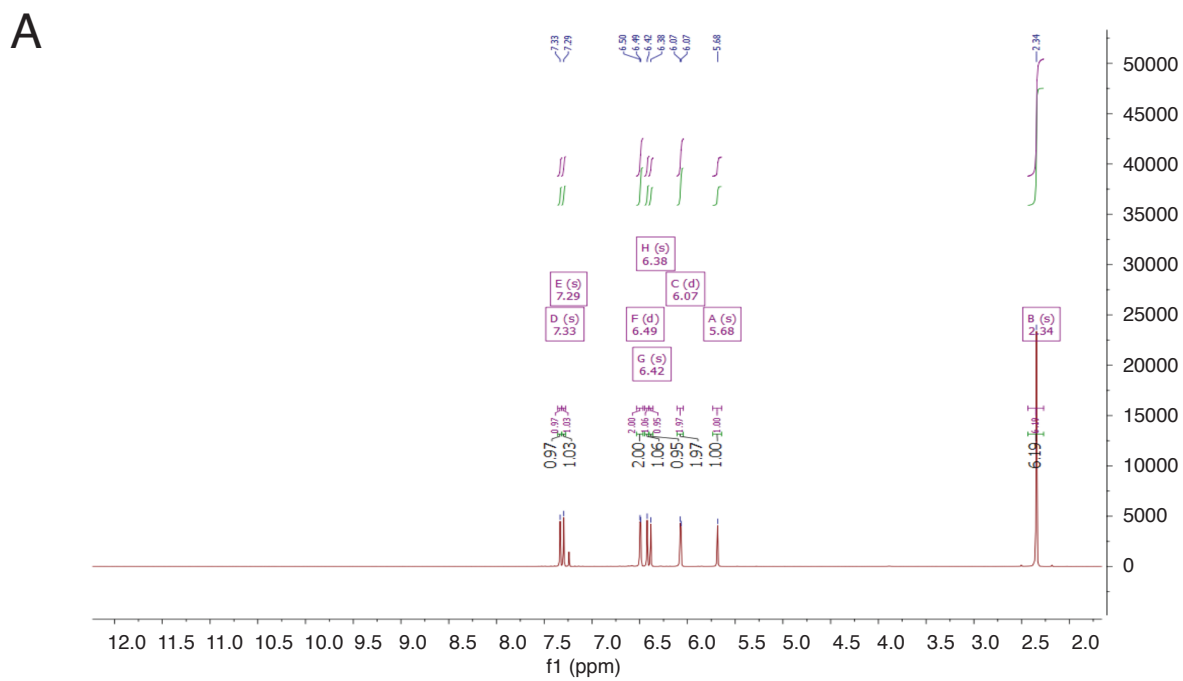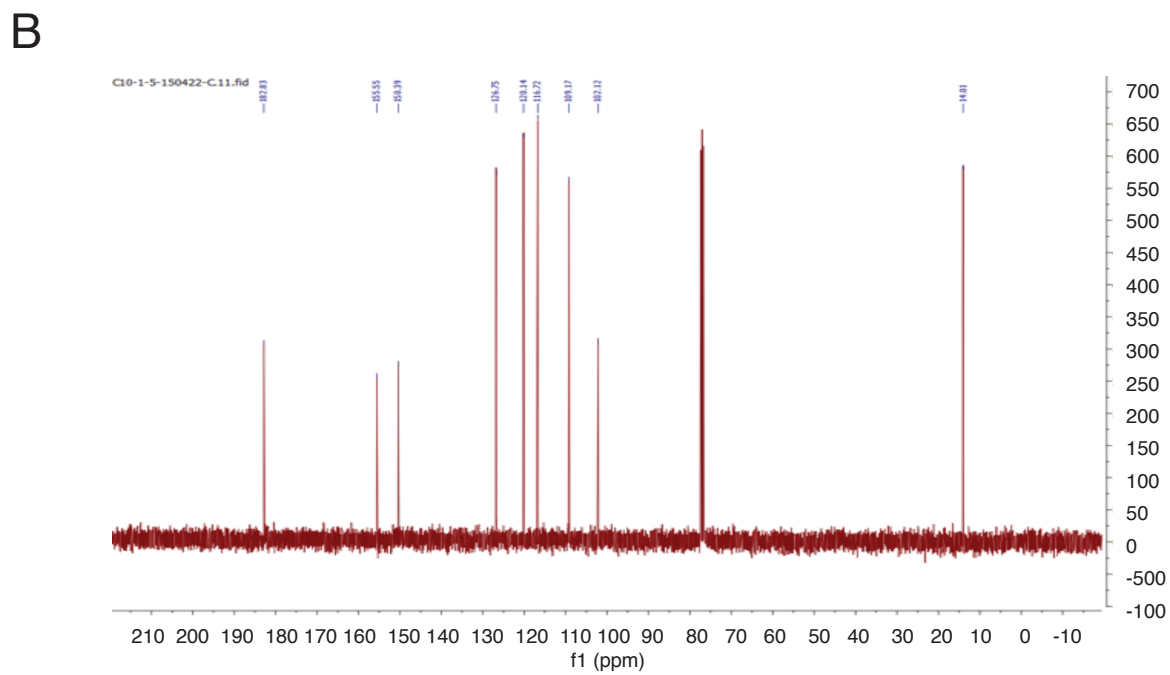

Fig. S6. (A)  $^1\text{H}$ -NMR spectrum of C10 in  $\text{CDCl}_3$  (400MHz) and (B)  $^{13}\text{C}$ -NMR spectrum of C10 in  $\text{CDCl}_3$  (400MHz).
