# Supplementary material for: An APE1 inhibitor reveals critical roles of the redox function of APE1 in KSHV replication and pathogenic phenotypes
Source: PubMed Central journal article supplement (PMC5381946; doi:10.1371/journal.ppat.1006289), 2017-04-05
Supplement: ppat.1006289.s007.pdf [file ppat.1006289.s007.pdf]

A

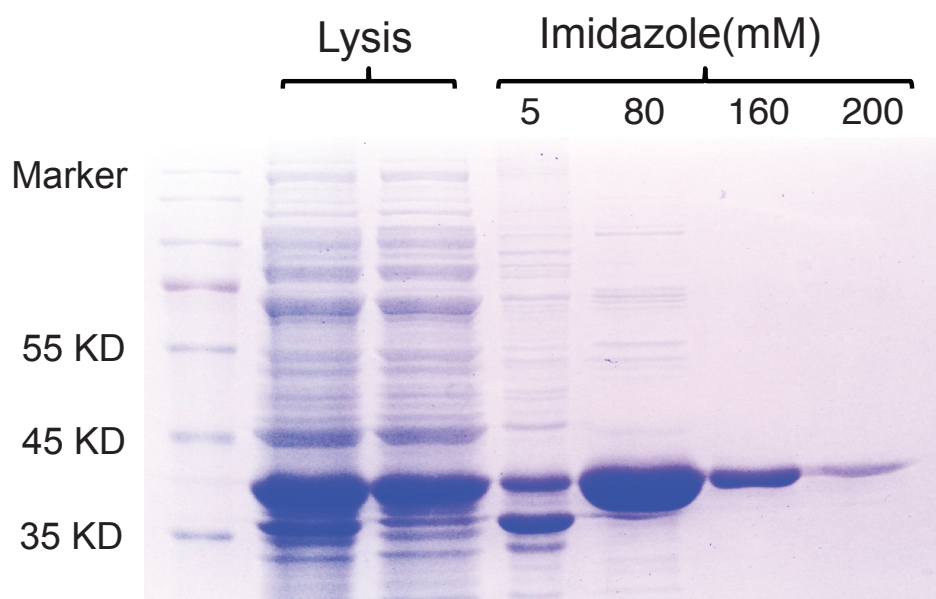

B

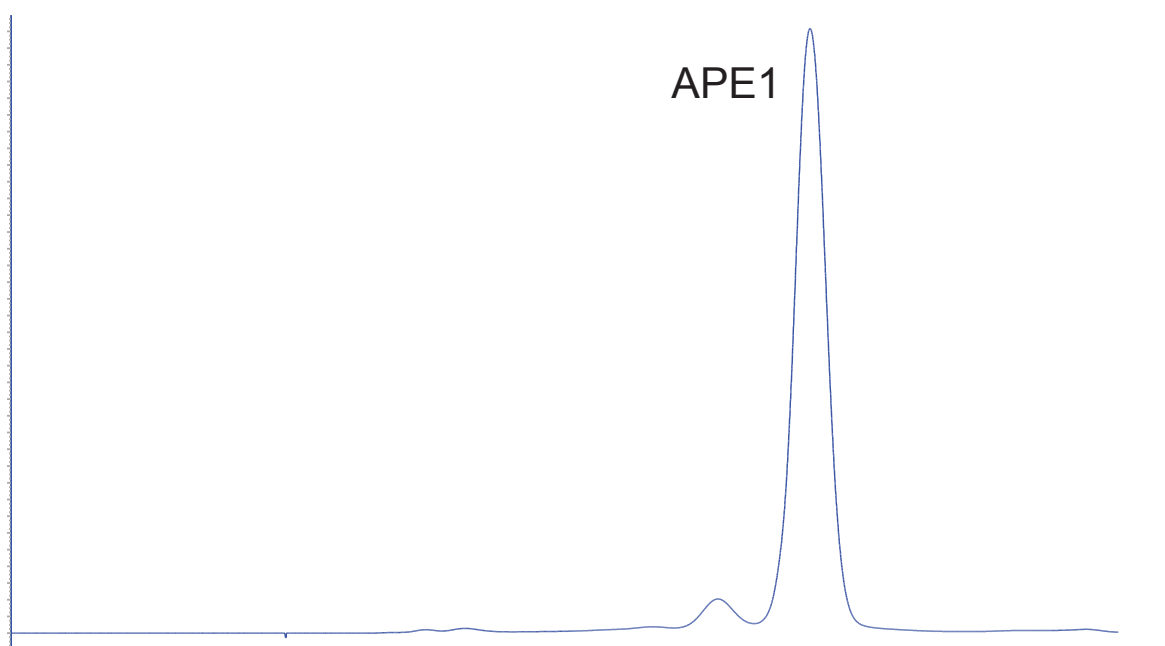

Fig. S7. Purification and purity of APE1 protein used in the study. (A) His-tagged APE1 was expressed in *E. coli*, purified with Ni<sup>2+</sup>-NTA-resin and eluted with buffer containing imidazole. (B) HPLC spectrum of obtained APE1 to show purify of APE1 used in the DSF, CD, SPR and EMSA assays.
